# Supplementary material for: Barriers and Facilitators to Implementation of a Telephone Follow-Up Program for Severely Injured Trauma Patients – A Process Evaluation
Source: Research Square preprint supplement (doi:10.21203/rs.3.rs-722754/v1), 2021-08-06
Supplement: Supplementary file 1 [file 1fe0bfa14db5c9e225ec60b4.docx]

**Supplementary Files**

TITLE:

Barriers and facilitators to implementation of a telephone follow-up program for severely injured trauma patients – a process evaluation.

BMC Health Services Research

**Authors**

Elizabeth Wake (BSc, MN) 1 2

Caitlin Brandenburg (PhD) 3 4

Kathy Heathcote (PhD) 2

Kate Dale (NP) 1 2

A/Prof. Don Campbell (FACEM) 1 2

Magnolia Cardona (PhD) 4 5

1. Trauma Service, Gold Coast University Hospital, Queensland, Australia.

2. School of Medicine, Griffith University, Gold Coast Campus, Queensland, Australia.

3. Emergency Department, Gold Coast University Hospital, Queensland, Australia.

4. Faculty of Health Sciences and Medicine, Bond University, Gold Coast, Queensland, Australia.

5. Evidence Based Practice Professorial Unit, Gold Coast Hospital and Health Service, Queensland, Australia.

| **Supplement number** | **Contents** | **Page #** |
| --- | --- | --- |
| Supplement 1, Figure s1 | Trauma Service Flow Up Program Flow Diagram | 2 |
| Supplement 2, Table s1 | Trauma Service Follow Up Program Components | 3-4 |
| Supplement 3, Table s2 | Semi Structured Interview Guide for Staff | 5 |
| Supplement 4, Table s3 | Semi Structured Interview Guide for Patients and Proxy | 6 |
| Supplement 5, Table s4 to s9 | Quotes illustrating themes in relation to process element | 7-29 |

**Supplement 1: Figure s1: Trauma Service Follow Up Program Flow Diagram**


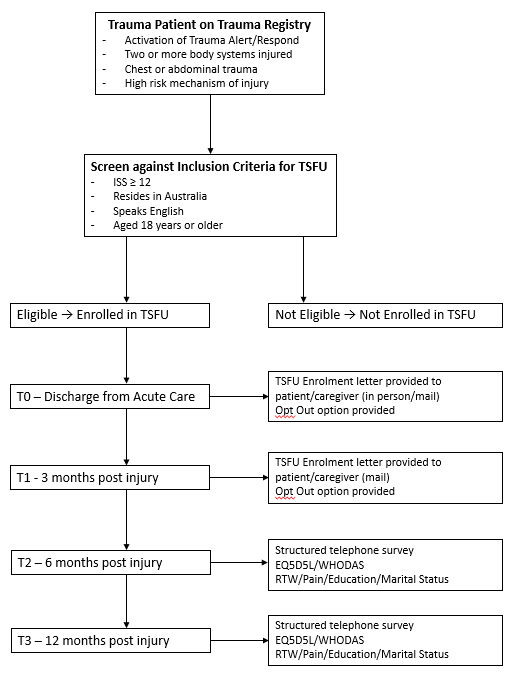


**RTW – return to work*

**Supplement 2: Table s1: Trauma Service Follow Up Program Components**

| **Component** | **Description** |
| --- | --- |
| **Resource Development** | Following meetings between the Gold Coast Trauma Service and team at the Victorian State Trauma Outcomes Registry Monash (VSTORM) who kindly shared many of their experiences and templates, resources were developed to conduct the TSFU program. This included: Inclusion and exclusion criteria for the TSFU; Automated screening report from the trauma registry to identify eligible patients; Data collection materials including the health-related quality of life (HRQoL) tools of the EQ-5D-5L [6] and the WHODAS 2.0 [7] (Permission from the WHO and the EuroQol were sought and obtained); A risk management strategy for identified ‘at risk’ patients and caregivers; Telephone script. |
| **Trauma Service Staff Training** | All staff who were conducting the telephone calls participated in an hour-long training workshop which outlined the program and the rationale for its implementation. It provided details on the HRQoL tools and the risk management strategy. Attendees received a copy of the training resources, consisting of the presentation, the HRQoL questions, the data collection pack and telephone script. |
| **Governance:**  **Trauma Advisory Committee (TAC)** | The Trauma Advisory Committee (TAC) governs and reviews the efficacy, efficiency and safety of the trauma patient care delivered at the institution. Its purpose is to ensure high standards of clinical care of trauma patients which is evidence based by advising on the development of the trauma service, provide a forum for interdisciplinary debate on issues, develop and review clinical guidelines and report key performance indicators to identify trends or gaps in service. It is comprised of service line directors of all divisions within the hospital which allows for recommendations to be reviewed and acted upon. The TSFU was approved by TAC prior to commencement. |
| **Screening and Identification of eligible patients** | The clinical members of the Trauma Service enter all consecutive patients who present to the institution and meet the trauma service criteria onto the Trauma Registry. The registry generates a weekly report of all eligible patients who meet the TSFU program. To be eligible for the TFSU program the patient must meet the following inclusion criteria are: 1) Patients with major traumatic injuries defined as an Injury Severity Score ≥ 12; 3) Resides within Australia; 4) English speaking; 5) Age ≥18 years. |
| **Patient and Caregiver Enrolment Information letter**  **(Timepoint 0 and Timepoint 1)** | Patients who are eligible for TSFU program are provided with a letter informing them of their enrolment into the program. This is supported with a verbal information provided by the Trauma Service during their admission. Contained within the letter is the aim of the program, the contact details of the Trauma Service and the option to ‘opt-out’ of the program. For patients who are discharged prior to receiving a letter, then a copy of the letter is sent to them in the post to the address listed in the Electronic Medical Records. |
| **6- and 12-month telephone call**  **(Timepoint 2 and Timepoint 3)** | Survivors to hospital discharge are contacted via the telephone at 6 months and 12 months post injury by a trained member of the Trauma Service using a structured telephone survey which included validated patient-reported outcome measures (WHODAS and EQ-5D-5L) [5 6]. The survey comprises of an initial screening, verbal consent and collection of health-related quality of life and functional data. Additional questions of work status, education level, marital status, residential status and self-assessment of pain.  Up to 5 attempts are made at different hours/days within the contact window before a patient is deemed a non-respondent. This includes an attempt to contact made by text message. This is a dedicated trauma mobile number which is monitored by the trauma service. The contact window was approximately 4 weeks (2 weeks before and 2 weeks after) the scheduled contact date. |

**Supplement 3: Table s2: Semi Structured Interview Guide for Staff**

| **TDF Domain** | **TDF Construct** | **Interview Phase** | **Question** |
| --- | --- | --- | --- |
| Knowledge | Knowledge  Knowledge about condition | Pre | Can you tell me what you know about the following up of trauma patients? For example, why is it performed, what has it found?  Do you know why Gold Coast wants to do it and can you elaborate on this? |
| Post | Can you tell me about the risk management guidelines?  Can you tell me about time when you had to use them? |
| Motivation and goals | Intention  Goals  Intrinsic motivation | Pre/Post | What was the reason for your decision to participate in the Trauma Service Follow-up? |
| Skills | Skills  Competence/ability  Interpersonal skills | Pre | What are your thoughts and/or feelings about undertaking follow up interviews?  What interpersonal skills do you feel that you possess that will be beneficial to you when performing the interview?  Can you tell me about the training that you have had to deliver the TSFU program? |
| Post | How did you find it performing the interviews?  Do you feel that you have developed any new skills since commencing the interviews? And can you expand on this?  Can you tell us about your experience when conducting the interviews? (prompt if required) Can you expand on this? |
| Social/professional role and identify | Identity  Group/social identify  Professional identity | Pre | How does the TSFU program fit within your role? Is there any conflict and can you expand if yes?  How does the organisation support you in delivering the TSFU program? |
| Post | Did participating in the TSFU fit with your role? If so how? |
| Beliefs about capabilities | Self-efficacy  Perceived competence  Social environment | Pre | What challenges do you foresee in providing the TSFU program? |
| Post | Did you encounter any challenges in providing the TSFU program? Can you expand on this? |
| Beliefs about consequences | Outcome expectancies  Appraisal/evaluation/review  Attitudes | Pre | What are the rewards from undertaking a TSFU program – to staff/patients/organisation/society?  What do you think are the consequences for staff/patients of providing a TSFU program?  Are there any harms in delivering a TSFU program/participating in a TSFU program? |
| Memory, attention, and decision process | Memory  Attention  Decision making | Pre | What, if anything would stop you from participating in the TSFU program? |
| Environmental context and resources | Resources – availability  Person/environment interaction | Pre | Are they any competing tasks that would influence your decision in participating in the TSFU program?  Do you feel that you have the necessary resources to undertake the TSFU interviews? |
| Post | Can you identify any facilitators or barriers that occurred when performing the TSFU? |
| Social Influences | Social support  Leadership  Team working | Post | Did you feel supported participating in the TSFU? Can you expand on why? |
| Emotion | Stress (positive/negative)  Fear  Stress | Post | Did participating in the TSFU evoke and emotional response? Can you expand on this?  To what extent did emotional factors facilitate or hinder your participation in the TSFU program? |
| Behavioural Regulation | Goal/target setting  Self-monitoring  Barriers/facilitators | Post | Did you feel prepared to participate in the TSFU program? If not what else do you think could have helped this process? |
| Nature of Behaviours | Direct experience/past behaviour  Representation of tasks | Post | What, if anything should have been done differently?  (prompt if required) How? Where? When  Are you able to suggest any ways in which the training could be improved?  What would help the TS in delivering the TSFU program? |

**Supplement 4: Table s3: Semi Structured Interview Guide for Patients/Caregivers**

| **TDF Domain** | **TDF Construct** | **Interview Phase** | **Question** |
| --- | --- | --- | --- |
| Beliefs about capabilities | Self-efficacy  Perceived competence  Social environment | Post | How did you feel about participating in the program? |
| Motivation and goals | Intention  Goals  Intrinsic motivation | Post | Are there any situations when it was difficult to participate n the TSFU program? Can you tell me about these?  What would help overcome these situations? |
| Skills | Skills  Competence/ability  Interpersonal skills | Post | Have there been any effects to yourself after performing the interviews?  How did you cope with these effects?  How did you feel during the interview?  Caregiver only  Did you feel like you had the ability to answer the questions on behalf of the patient? |
| Social Influences | Social support  Leadership  Team working | Post | To what extent did emotional factors facilitate or hinder your participation in the TSFU program? |
| Behavioural Regulation | Goal/target setting  Self-monitoring  Barriers/facilitators | Post | What, if anything, should have been done differently in the TSFU program? How? Where? When? |
| Beliefs about capabilities | Self efficacy  Social environment  Empowerment  Self-esteem | Post | Do you believe the program was useful? If yes/no, please explain why? |
| Social/professional role and identify | Identity  Group/social identify  Professional identity | Post | What would help the Trauma Service in delivering the TSFU program? |

**Supplement 5: Table s4: Quotes illustrating themes in relation to process element**

Theme 1: Time

DOSE – the extent to which the participants interact with the intervention [14].

| **Timepoint** | **Barrier/Facilitator** | **Participant** | **Quote** |
| --- | --- | --- | --- |
| Pre | Barriers | Male, staff_1  Female, staff_2  Female, staff_3  Female, staff_4  Female, staff_5  Male, staff_6 | - *follow up is quite time consuming when its busy* - *it’s a new service and some people have got behind with their interviews and so we have had to do more which adds to the time* - *it takes time to check the patient details to become familiar with the patient prior to calling them* - *time means staff which means money* - *the TS jobs are heavily loaded, time poor and quite stressful – we need to look after the staff* - *it’s hard to stop the patients being verbose and I have issues staying on script* - *sometime the phone call hasn’t been convenient, and we have had to reschedule* - *I think the follow up program is positive we just need to recognise the impact of trying to fit it in* - *The questions, some are repetitious; depending on the patients’ injuries it can be difficult to ask* - *I read the questions; I just summarised some responses* - *Time management is a barrier, finding the time to do the calls* - *We don’t have lot of management days (non-clinical time) and we have other jobs to do* - *Struggled with the wording of the questionnaires; I try not to reword them, but you have to make patients understand* - *I’m looking forward to it but it another task* - *Its fits in the schedule* - *I’m senior and have many responsibilities, mentoring students, other staff, lots of different tasks, it’s difficult to balance the follow up and other demands* - *Time would be the biggest barrier* - *Time, if you don’t have time to do the follow up you can feel stressed, having another thing to do* - *Feeling anxious/stressed about completing the phone calls each month* - *I need to be self-disciplined and organised, have deadlines, schedules when I’m going to make the phone calls, make it a priority* - *I did call people, but they were not convenient times* - *I have many roles and it’s difficult to meet all the demands in the roles* - *It can be challenging to embed in just one role, I don’t have protected time; other team members have non-clinical time* - *Biggest challenge is between clinical and non-clinical time; non-clinical is at the cost of clinical time* - *There are competing demands and I have to prioritise; assessing which is the highest priority* - *If you follow the script the questions are easier; after performing several the questions get easier* - *Time to do the follow up is a constraint, not the right time for patients or staff at times* - *I’ve managed my time regarding follow up, I schedule time to do it* - *The time regarding the administration/organisation of the program – it can cause stress* - *Follow up program is putting extra load on certain roles* - *Follow up is time consuming* - *Challenges include suitable timing of the phone call for the patient* |
|  | Facilitator | Female, staff_2 | - *Having allocated time to do the follow up* - *Questions could be written differently, the more I read it the easier it was, initially I struggled* |
| Post | Barrier  ‘Finding the time’ | Female, staff_3  Female, staff_8  Female, staff_7  Female, staff_5  Female, Staff_4  Male, staff_1  Female, staff_2 | - *it’s hard when everyone’s clinical, it’s hard to fit everything in* - *we are not here after hours when things might be different clinically* - *there’s not really the opportunity and funding for me to take time away from my clinical role to do research* - *it’s up to me to manage my workload, meet all the requirements that I have clinically and non-clinically for the department* - *time is the main thing, just having a lot of competing responsibilities, just trying to work out how to prioritise the calls amongst everything else* - *when you had to do it (the calls) on a longer day, a management day, I found it didn’t give me great job satisfaction* - *when it was broken up into shorter stints of doing it, it is more doable and manageable for me* - *it’s hard to make phone calls when you have a busy office, when you’re trying to concentrate* - *I’ve got a certain amount of time to do the job throughout the day, it’s one of the tasks I need to get done* - *It’s mostly a time thing, finding the time to get the calls done is probably the biggest challenge* - *Initially people were a bit pushed with regards to getting the phone calls done* - *I do struggle with other roles and expectations and being a full-time clinician* - *It certainly has some workload issues to it in the time that it takes* - *I often struggle to find or make the time to do the calls within the timeframe* - *My organisational skills and fitting it into my day and getting it done within the timeframe is often a challenge for me* - *I suppose time, finding the time to do thing, having the time to do them* |
|  | Barrier  ‘contact’ | Female, staff_3  Female, staff_4  Female_staff_2 | - *even if you have a spare 15-30 mins you can go and do the phone calls and then you can’t get through to them* - *I think the biggest frustration is trying to get people on the phone, which is the tedious part of the process* - *You do get a bit frustrated at times doing multiple calls and sometime people can be flighty* - *There were people who just didn’t answer, who you try continually* - *I mean probably more frustrating in trying to contact someone continually and not getting any response, even though you have sent them a text to try and get some sort of response* - *Then you ring the GP and they haven’t heard from them, so it is hitting brick walls, that’s what I mean by frustrating* - *More the process of trying to contact, rather than the actual contact* |
|  | Barrier  ‘Explanations and call duration’ | Female, staff_3  Female, staff_9  Female, staff_3  Male, staff_1  Female, staff_2 | - *some phone calls could be quite tedious because patients felt they needed to explain every answer in varying details* - *it could take a lot of time and repetition* - *some people didn’t really understand the questions (paraphrased)* - *could be frustrating, like when patients are taking a really long time to answer the questions or would choose the fixed response* - *can be quite frustrating, particularly if you only have a certain amount of time to get a couple of the calls done* - *reaffirmed how much explanation you might need to give to people who aren’t familiar with specific terminology* - *just the different levels of people’s education and their cognition and what you’re saying, if it makes sense to them* - *in the simplest of terms, the standardised too can still be confusing to some people* - *- you can tell some people had difficult putting the concepts together (severely, or moderately)* - *Some of the calls are really draining, a lot of the older patients want to have a chit chat which is beautiful but when you’re trying to get a job done* - *Its hard work when you’re trying to bring them back to the question and they’ve gone off on different targets* - *It’s a bit exhausting and draining – draining as you get sick of making the calls because its monotonous* - *In a couple of calls patient have been fixated on talking about other things* - *There is a lot of clarifying questions that you need to nut out with the patient that aren’t necessarily per script* - *Often, I find that you have to nut it out because of people’s health literacy, normal literacy and education skills* - *Trying to understand and paraphrase things into a way that they understand* - *Sometimes patients can be quite verbose in their answers and some are quite hard to keep on track* - *Sometimes one question may lead to a number of answers* - *Then there were those people who you couldn’t get off the phone* - *The language barrier was difficult, if English wasn’t their first language, obviously they can speak English, but it still can be very difficult to interact over the phone* - *Some of the questions, they are repetitive, there not you everyday questions, I think I found that hard to decipher at times* - *Some of the questions were difficult* - *When you were asking them about their pain, and they don’t want to give you a number of they don’t understand* - *I guess you’ve just got to try and find a way to make it work, to make them understand* |
|  | Barrier  ‘Lack of flexibility’ | Female, staff_3  Female, staff_5  Female, staff_9  Female, staff_2 | - *we’re not here after hours when things might be different clinically* - *I guess some of the challenges where you would ring the patient and they were busy* - *Not that you don’t have the time, but you can’t call back necessarily at the exact moment that’s responsive to the patient* - *You can predict when the best time to contact them or them to contact you will be* - *It’s about the flexibility of the time you have got and your ability to shift around that day* - *You can allocate a time for them, that’s convenient for them, but then maybe we can’t get back to them at that time* - *You could be asked to call a patient at a specific time but that didn’t always work, because depending what was going on, you could be in the middle of something* |
|  | Barrier  ‘Reluctance’ | Female, staff_8  Female, staff_5 | - *I felt like I had to contribute to the team, I felt that I wasn’t contributing enough when other staff were doing the follow up phone calls* - *We decided to push it onto those that weren’t keen initially to be involved in the project; now it’s just business as usual I guess for the clinical staff* |
|  | Barrier  ‘Time of call’ | Female, patient/proxy_10  Male, patient/proxy_13  Female, patient/proxy_15  Female, patient/proxy_14 | - *Working makes it difficult to answer the phone* - *Working and the timing of the calls can impact on people participating in the program* - *They (the TS) were chasing the patient for quite a while* - *I’m retired and can take a phone call, but people have busy lives* - *A lot of people have got families and they just don’t have time to do it, to take the call* - *I’m happy to do it but a lot of people wouldn’t do that, they would have the time* - *Everybody now, it’s all to do with time and how much they have in the day* - *Most people couldn’t do this at work through the day* - *Probably weekends wouldn’t be too bad but that’s me personally I think, well weekends there’s nothing going on* - *The duration of the call was just right* - *I can’t remember coming out of it going oh that was too long or too short* - *I think it was just the right amount of time* - *Better in the afternoon I suppose, when I’m finished work and getting the kids home* |
| Post | Facilitator  ‘Shift work’ | Female, staff_3  Female, staff_8  Female, staff_5  Female, staff_4 | - *we’re not here after hours when things might be different clinically* - *doing the telephone calls in shorter shifts was more rewarding (paraphrased)* - *I felt more motivated to do things in a two-hour slot that I did to do it over an 8-hour day* - *I gave it to someone who was on the afternoon shift, they were to contact them, in the evening* - *being able to be flexible with your day* - *I think on days where I’ve had other duties, I could be more reactive/flexible in my time, that facilitates getting more done* |
|  | Facilitator  ‘Dedicated/protected time’ | Female, staff_3  Female, staff_5  Male, staff_1 | - *if I has just a whole day to do the calls, I wouldn’t have found it anywhere near as frustrating* - *the case managers get allocated management time, so there is allocated time for them to do this type of task* - *I do know that in our rostering for the clinical case managers, they are allocated some management tie which gives them time to conduct these calls; its separate to their clinical workload which I think is great advantage* - *I think if we don’t have dedicated time it’s something that could suffer; I think its important thing to build into the role if it’s going to have longevity* |
|  | Facilitator  ‘Team approach’ | Female, staff_5  Male, staff_1 | - *we’ve got buy in from our allied health team and great AO support* - *its resource heavy but I feel we have the resources to manage it with everyone doing their bit* - *there have been times when the case managers have done their calls and they’ve offered to do mine, which has helped with the load* - *I know my colleagues will often take up my shortcomings shall I say* |

**Supplement 5: Table s5: Quotes illustrating themes in relation to process element**

Theme 2: Patient and Trauma Service clinician relationships

DOSE – the extent to which the participants interact with the intervention [14].

| **Timepoint** | **Barrier/Facilitator** | **Participant** | **Quote** |
| --- | --- | --- | --- |
| Pre | Barrier | Male, staff_6 | - *If follow up reveals an unmet need then accountability is an issue as patients no longer under hospital care* - *If patients express a need the staff become responsible* |
| Post | Barrier  ‘No relationship’ | Male, staff_1  Female, staff_2  Female_staff_8  Female, staff_5  Female, staff_2  Female, staff_9 | - *It takes time to check the patient details to become familiar with the patient (prior to calling them)* - *There are some patients that are resistant to contact or engagement at whatever level* - *The questions, depending on the patients’ injuries, can be quite difficult to ask* - *The follow up completes things, we know how they are really coping* - *If there is someone in another building asking questions without an understanding* - *Telehealth – its impersonal, it doesn’t feel like they really know what you’re going through* - *Unless someone has that understanding or experience to understand what the patient is trying to say to them about recovery or trauma* - *Some patients you ring, and you don’t remember them or you might not have even met them* - *The ones I didn’t know, I ask the questions to the script and get off the phone* - *I don’t think you get a truthful response, because they just want to get off the phone* - *If its someone that you have had nothing to do with it can be quite, I want to say clinical* - *Whereas if you don’t know them, it can sometimes be quite cut and dry* - *- If you’re not comfortable ringing a particular person for a particular reason then it was never a pressure to do so* |
| Post | Barrier  ‘Negative experience’ | Female, staff_3  Female, staff_8  Female, staff_9  Female, staff_5  Male, Staff_1  Female, staff_2 | - *But if it was someone that you didn’t necessarily want to talk to again, I think I’d just hope they don’t remember me specifically from the trauma service* - *I had somebody who was just like they just didn’t want to participate and so we didn’t go through with that one* - *There was one patient who wasn’t happy with the overall hospital service; I didn’t take it personally, I made sure before I hung up that he had the patient liaison phone number* - *I didn’t feel comfortable asking questions about mobility and activities, because I knew the answers already* - *One patient I didn’t feel comfortable again ringing at 12 months, id found the 6-month difficult, so it was quite accepted that somebody else took that on* - *It was a negative experience as I felt that the relative made me feel like I was wasting her time, that I was an inconvenience* - *I think when they get home, they get lots of different phone calls because she said someone’s only rung me two weeks ago* - *I think a patient relative; he was furious – we escalated that to my boss* - *I don’t think they’re positive experiences when you have someone taking it out on you* - *I have heard of others having negative interviews, or interviews with a negative tone, but I haven’t had any negative ones myself* - *Previous experience the relative was upset about a range of issues, having to speak to that person again, I just thought it was going to be a similar experience* - *Sometimes a previous relationship can be a bit of a hinderance, but I think that was more of my own apprehension than on the patients or relatives’ side more than anything* - *(Some calls) you feel like they do not have time for it, it’s quite obvious* - *I think you can tell by the way in which they reply* - *It’s the tone; if you pick up on the tone, I don’t want to continue with a seven-minute conversation* - *If you’ve had a patient who was a little bit difficult to deal with, you would hope, I would hope the interview would be as its meant to be* |
|  | Facilitators  ‘Service development’ | Female, staff_3  Female, staff_9  Female, staff_5  Female, staff_4 | - *we have a lot of patient contact, so I think I would be an appropriate person to do a call from that point of view* - *it could have direct implications on what to do as a physio based on the feedback I get* - *the themes I may find from the patients answering questions* - *indirect feedback about how we manage our patients and what we might be missing; it’s an opportunity to improve our practice* - *we probably have the most contact out of everyone in the team that consistently, like the time we spend with patients* - *we spend a lot of time with patients and we do have the impact on the outcomes that they have* - *I think there is an advantage in having firsthand feedback* - *The patients we were calling were actually part of the Trauma Service and so it was just following them up from being an inpatient* - *Its almost like complete loop closure* - *There on the program because they were trauma patients* - *If you think – who else would have followed up on this phone call – this is really important because we are actually making a difference* - *The trauma service, we’ve always been a constant with these patients while they’re in with us* - *It’s just an extension or our care that we give, which is important* - *I’m involved in their clinical care from the beginning to the end, and then I see the patients in clinic as well* - *I do think there is a lot you can do whilst you’re on that call that isn’t next necessarily extra work, its that therapeutic relationship to support the patient* |
|  | Facilitator  ‘Positive experience’ | Male, staff_1  Female, staff_2  Female, staff_3  Female, staff_8  Female, staff_9  Female, staff_5  Female, staff_2 | - *I’ve done several calls and patient were appreciative of the contact, the follow up and the opportunity to talk* - *You can just tell from the attitude of the call that the person making the call is enjoying it and having some light-hearted humour with eh patients and also positive feedback* - *I think it has lots of benefits beyond just the patients’ health* - *The interaction is nice for them, having someone listen to them* - *The people knew that you were calling, which was nice, so they were expecting the phone call* - *The good phone calls, they were happy to talk to you, answered questions nice and succinctly and were happy to give feedback* - *Even if they had some negative feedback, it was really nice to feel that there was an opportunity for people to do that* - *Sometimes if I knew, if I remembered the patient, it could be a positive too – you’d have that opportunity to have a nice conversation with them and see how they are going and maybe they might give you more information than what they previously would have given someone they hadn’t met before* - *Positively I think they were the calls where people were expecting your calls and they were just happy to hear from you and had the time straight away and didn’t sound annoyed that you were calling at that particular time* - *They just understood that there were just some questions to answer, and they answered succinctly and gave, even if it was some negative feedback, they gave useful feedback* - *In one call the patient sounded quite annoyed that id called at that time and just wanted to get it over and done with, but after talking and whether it was just that then she had an opportunity, so it broke down the walls a little bit, her being able to talk about what the struggles were* - *I think it was nice that the reactions of patients, that they weren’t forgotten, that they could communicate if there was a problem* - *I know a lot of patients appreciate our phone calls so Im sure that if they could actually see us that it would be a lot more personal* - *I was tasked with calling a spinal injury patient that I knew was incapacitated from the waist down; I actually enjoyed it in the end, because of the patient’s progression, it had left a positive spin on the process of doing follow up* - *One patient, she was so happy to have somebody ring her to ask her how she was and just to have that time to actually spend with her chatting – I spent longer on the phone with because she was appreciating that someone was checking up on her to see* - *I felt it as a very positive experience because you felt that you’d actually – you’d made a difference in someone’s day* - *It’s nice to hear positive, the patient is happy, you can hear it in their tone, the way they speak to you* - *It was pleasant, and she’s talking about things that she was going to do the following day* - *You’re building a relationship* - *I think its nice when you can have a nice conversation, and someone actually wants to talk to you* |
|  | Facilitator  ‘Familiarity/Rapport’ | Female, staff_8  Female, staff_5  Female, staff_4  Male, staff_1  Female, staff_2 | - *It was nice when you recognised the patients name and you could relate to them, as I remember you coming in* - *I always read their notes first to get a bit of a feeling of what the admission was like for that patient* - *I may not know the patient; I may not have looked after them but I know their journey* - *Familiarity with the patient or the patient’s journey is valuable* - *I do now see the benefits and that rapport with patients that someone from team has rang them* - *Probably with the patients I knew, or the family I knew, the call was a bit more personal* - *I’d done a chart review before calling them and I was able to see what services they were linked into* - *I was able to even specifically say, you have talked to me about this* - *It really does help with the phone call* - *I think it would be really challenging if you didn’t know and have a previous relationship or understanding of their health background, their health literacy and understanding of their own health conditions and you’re an outsider* - *I do wonder whether they, knowing that you’re from the trauma team and you work within that service that sometimes helps people open up because they know that you were part of that journey, even if you weren’t part of theirs specifically* - *Having a therapeutic relationship knowledge of the patient, I feel from my end makes me feel more comfortable going into the call* - *I’ll call those patients because I have a relationship with them already, it does help obviously I’ve had multiple interactions with the patients and their relatives over an extended period of time* - *I may have spoken to them numerous time post discharge* - *I think it’s, in some ways, easier to broach some of the topics (because of the relationship)* - *Knowing he history, I can more or less, I know what they answer they’re going to come up with* - *I know where the patient is at* - *They (the patients) find it easier to talk to me about some of the more sensitive issues (? Due to relationship)* - *They (the patients) know that they can go there with me with those sorts of things* - *I think it’s a positive thing to have a relationship beforehand* - *I would say that the majority of the time, having a previous relationship and knowledge of that patient is an advantage* - *I think it can make it feel more like a personal thing or more personal perhaps, more like its someone that you know* - *Sometimes when you know them and they remember the service and I think its just – it can be easier* - *sometimes because even if you are drawing on things that, depending on how long they were with you for or how much interaction you had when they were here,* - *So that interaction is different to someone who you’ve actually watched and maybe seen develop or recover or whatever it may be* - *More warm and fuzziness to one and the other one is just not as warm and fuzzy* |
|  | Facilitator  ‘Job Satisfaction’ | Female, staff_9  Female, staff_8  Female, staff_4  Male, staff_1 | - *Just trying to help a patient was something that I was happy that I was able to do* - *Improving someone’s day, someone’s life, helping them feel happier rather than feel sad* - *It was like closing the loop on the patient especially on the 12 month follow up call* - *One patient had a lot of emotional issues, she’d had no therapy or contact with any kind of counsellors or psychologists, I spent a lot of time talking to her, I gave her some contact numbers, she was appreciative – it was a good day* - *It does make a difference when someone’s really appears to appreciate your call* - *I felt good that I helped someone, it was a good feeling* - *The phone calls can be draining and monotonous but when you get something like that – it makes it worthwhile* - *If you think – who else would have followed up on this phone call – this is really important because we are actually making a difference* - *I’m actually looking forward to speaking to her again at the 12-month mark* - *Feel like I’ve done something good* - *You get the really really good calls where your like, wow, that’s a really good news story* - *I find it a pleasant and uplifting experience usually for my part and I feel that from the patient as well* - *They’re like wow, yeah, somebody is still thinking about me and somebody is still listening to me* |
|  | Patients/Proxy | Patient/Caregiver_10  Patient/Caregiver_11  Patient/Caregiver_12  Patient/Caregiver_13  Patient/Caregiver_15  Patient/Caregiver_14 | - *If you were concerned about anything, you would go to the trauma team* - *Having a link to the clinical team who cared for the patient in the hospital is important* - *They (the trauma service) said if anything that worried me, to get back to them and to let them know what’s happening* - *It was reassuring talking to them and telling them what’s been going on and everything* - *I’m talking to the people who know him and they know his health and so I know that these people can get something done* - *That’s what reassures me, whereas if I was talking to somebody who is separate to the hospital, they may not be able to get things done* - *They were really good, checking up on us and everything* - *If there had been a problem, I would have rung the trauma team straightaway* - *They didn’t just send him home and forget about him; they followed him right through it all, that was important* - *We got phone calls to see how he was going* - *I think he was cared for very well* - *Ongoing care positively effects relatives opinions of the hospital/trauma service* - *I’ve been getting the follow up calls to see how I’m going* - *I’d have to say I’m pretty happy* - *Pretty chuffed that someone from that unit where they were dealing with me in the hospital, they ring up and talk to me as a follow up* - *For someone’s that’s really busy, I was pretty stoked to have someone ring me like that* - *It made me feel pretty good that someone had the time to do it; that they cared enough to ring up and follow through* - *I prefer someone from the hospital because they have probably got a fair bit of idea what has happened in the past* - *just so information doesn’t get misconstrued or lost* - *so, information doesn’t get lost from previous appointments and all that* - *its more accurate than talking to someone who’s just calling up because they have been told to* - *I think its good to talk to somebody* - *Somebody that, how can I put it, people probably understand how I feel* - *I think its good to talk especially to you sort of people* - *Not a call centre, they are the last card in the pack, they are very impersonal* - *To know that you guys were checking in was a bit – it was nice to know that you were still there checking in on me I suppose* - *Care for, definitely* - *It was nice to know that I had gone from the system, but I was still being checked in on to see how Im travelling and everything like that* - *Good that they are checking up on patients, its good, like you haven’t been forgotten* - *They just were making sure I was okay, making sure if I needed anything extra, they obviously jot it down* - *It would feel more comfortable with a clinical person* - *It would be different if it was like an admin person in the hospital* |

**Supplement 5 Table s6 Quotes illustrating themes in relation to process element**

Theme 3: Clinician Identity

FIDELITY – the extent to which the intervention was implemented as planned [14].

| **Timepoint** | **Barrier/Facilitator** | **Participant** | **Quote** |
| --- | --- | --- | --- |
| Post | Barrier  ‘Role Identity’ | Female, staff_8  Female, staff_9  Female, staff_3 | - *It did make you feel like a better nurse per se whenever you were that person who helped care for that patient and it did make them feel like they weren’t forgotten* - *being clinical, I am definitely more a hand on, a doer, whereas this to me felt more administrative* - *I didn’t feel it had to be a clinical nurse that did it* - *I always read their notes first to get a bit of a feeling of what the admission was like for that patient* - *You feel a bit protective with your patients; we know them; we understand their journey* - *I may not know the patient; I may not have looked after them but I know their journey* - *Someone in telehealth might just not know their journal and might not have empathy* - *Familiarity with the patient or patients’ journey is valuable (paraphrasing)* - *Not clinical staff – may be impersonal; they don’t really know what the patient is going through (paraphrased)* - *Unless someone has that understanding or experience to understand what the patient is trying to say to them about recovery or trauma or psychological effects, like feeling depressed* - *Before taking part in the phone calls, I would honestly have said surely you could get a telehealth team to do this; now that I have taken part in the phone calls I do see the benefit of a nursing capacity doing it* - *I do now see the benefit and the rapport with patients that someone from the team has rang them* - *I’m a nurse, that’s my job, I’m there to help people* - *a lot of the time when we do these, it’s just ticking boxes* - *I think (a clinical team member) would have a better idea of what way to direct the patient if they had specific issues* - *I think its something that could be taught quite easily to somebody; I really don’t necessarily think it has to be a clinical staff to do it* - *I think ideally, having someone and that’s their job, would work well* |
|  | Facilitator  ‘Delivery of Care’ | Female, staff_8  Female, staff_9  Female, staff_3  Female, staff_4  Male, staff_6  Male, staff_1 | - *One of the better ones is when you can offer help* - *Being able to help rather than something being a little repetitive and non-rewarding* - *Improving someone is days, someone’s life, helping them feel happier rather than feel sad* - *If someone is in pain you can bring them down a pathway of getting their pain sorted* - *I think its important for the person doing the phone call to have an understanding of the questions and relating them back to the trauma, I really do* - *You have empathy; empathy is something that you can draw on when you’re doing the phone calls* - *Follow up helps to tell the patient we are still here and listening; were still trying to make things better for you* - *Patients can feel that someones cares post hospital discharge* - *It was the patients that we were calling; they were part of the trauma service and so it was just following them up from being an inpatient* - *We are following them up at 6 months, just making sure down the track, have any other issues* - *It’s an extension of our care that we give, which is important* - *I had a call with a patient who had cognitive symptoms and I wasn’t exactly sure what kind of referral to put in place or who I should talk to; I spoke with the OT and called the patient back with the information and said the next time you see your GP its important you talk to them so they can link you with correct services* - *I don’t remember recommending anyone for psychology, its just been physio, OT and the GP for pain* - *I think there is a benefit to having a health professional do the calls because you can give the most advice (even though the point of the service is not to give advice)* - *Follow up helps to tell the patient we are still here and listening; were still trying to make things better for you* - *Patients can feel that someone cares post hospital discharge* - *The trauma service, we have always been a constant with these patients while they are with us, so its just an extension of our care that we give, which is important* - *I think the contact that the patients are getting from us, they feel recognised as an individual and not just a number* - *They’re like wow, yeah, somebody is still thinking about me and somebody is still listening to me* - *Post trauma can often be very lonely existence I think for people when they’re discharged home; I think having that personal contact is probably very valuable to them even though they mightn’t recognise that* - *The patients feel valued and validated in that somebody is ringing up and taking time to care and question and if needed, offer advice or avenues or referrals* - *We might even refer them further onto other gold coast health avenues, like persistent pain or psychology* |
| Post | Facilitator  ‘Extension of clinical care’ | Female, patient/caregiver_10  Male, patient/caregiver_ 11  Male, patient/caregiver_12  Male, patient/caregiver_13  Female, patient/caregiver_15  Female, patient/caregiver_14 | - *The care extended past his hospital stay* - *I’ve been getting the follow up calls to see how I’m going* - *I’d have to say I’m pretty happy* - *Pretty chuffed that someone from that unit where they were dealing with me in the hospital, they ring up and talk to me as a follow up* - *For someone’s that’s really busy, I was pretty stoked to have someone ring me like that* - *It made me feel pretty good that someone had the time to do it; that they cared enough to ring up and follow through* - *I feel its important that you feel the hospital is helping after discharge* - *It shows us your not just – once were out the door your not – that you don’t care anymore kind of thing* - *Like once your out the door; there not our problem anymore, next patient kind of thing* - *Ive spent that much time in my lifetime in hospitals its just like, well if your not going to give a shit why bother coming back* - *The follow up phone calls provide you with an opportunity to contact the hospital* - *It makes me feel more confident* - *Its great to know that they (the hospital) still care enough about you to want to contact you* - *I think with the hospital, they should take your case a little bit more personal* - *The personal touch makes you feel better* - *To know that you guys were checking in was a bit – it was nice to know that you were still there checking in on me I suppose* - *Care for, definitely* - *It was nice to know that I had gone from the system but I was still being checked in on to see how Im travelling and everything like that* - *Good that they are checking up on patients, its good, like you haven’t been forgotten* - *They just were making sure I was okay, making sure if I needed anything extra, they obviously jot it down* |

**Supplement 5 Table s7 Quotes illustrating themes in relation to process element**

Theme 4 & 5: Teamwork and peer support and Leadership

Context: aspects of the environment that may influence intervention implementation or study outcomes [14].

| **Timepoint** | **Barrier/Facilitator** | **Participant** | **Quote** |
| --- | --- | --- | --- |
| Pre | Barrier | Female, staff_3  Female, staff_4 | - *Historically research isn’t valued in the department; there’s not really opportunity from a staffing or funding point of view for me to take time away from a clinical role* - *We don’t have senior staff who are involved in research it’s not celebrated* - *People aren’t given that time* - *The leadership are not involved in research themselves so there’s no role modelling* - *It’s not in our day-to-day vocabulary* - *There are limited formal opportunities/EOIs for research (paraphrased)* - *It’s very challenging to get support to reach any research or nonclinical development goals* |
| Pre | Facilitator  ‘Teamwork and Peer Support’  ‘Leadership’ | Male, staff_1  Female, staff_2  Female, staff_3  Female, staff_4  Female, staff_5  Male, staff_6  Female, staff_5 | - *The trauma service is a supportive team, everyone joins in and does the best they can* - *I think we need to train others and expand* - *I just don’t see the medical staff doing it, I think it would be too hard; they have busy workloads, they are busy and not all of them are holistic and good communicators* - *The TS are all participating as a group, its important that we all do what we can* - *The TS will help each other out, we all get in and do it* - *We all have the same goal, what is best for the service* - *I think if we (the TS) need to get something done we get it done; that’s how the service functions* - *Debriefing helps you deal with it (the experience)* - *I assume the organisation supports it because they support the TS and our roles* - *The organisation supports research, and this is a research project* - *A team approach to follow up is best* - *I would like to be involved in other projects, to further my role* - *I didn’t ask permission from my bosses; I think they would see the value* - *I don’t think I need contact with the trauma team to make the calls; but the sense of team and everyone contributing.. being able to brainstorm with the team, make others aware* - *I’d like to be involved in research but didn’t know where to start* - *I was eager to be with a team of researchers* - *Fearful of not following process correctly and affecting data – not about the conversations (with patients) but more about the research part of the project* - *From a department viewpoint participating in research is part of the strategic plan* - *Research is part of my learning goal* - *Professional capability framework, im supported with leadership training* - *Having a network/team all participating, were doing it together* - *Peer support is important, we are learning to engage, the team is reassuring and adds to the individual confidence* - *The previous (research) experience of the team can be daunting but it’s good to do the journey together* - *We have built the follow up into the current team, no additional resources were asked for* - *I’m hoping that the staff talk to the rest of the team; we have no formal process to manage staff or distress* - *I feel like there is enough staff to complete it; the allied health staff can assist* - *Follow up could incorporate an MDT approach* - *The follow up program has been endorsed by TAC; TAC is made up execs/clinical directors involved in trauma care, it’s an MDT approach* - *TAC is supportive of the follow up program* - *The entire leadership team being passionate about the project, and then we just made it part of the other staff members role* |
| Post | Barrier  ‘Lack of teamwork’ | Female, staff_9  Male, Staff_1 | - *It makes it harder when you have to take on other people’s phone calls* - *I understand that everybody’s got other work commitments, buts it’s very frustrating when you have to do other people’s calls* - *I sometimes think that people don’t pull their weight and it does get left to other people* - *Sometimes you can’t physically do anymore because it does take a lot it time (paraphrased)* - *I know some people who have been resistant to take on this extra role* |
| Post | Facilitator  ‘Joining a team’ | Female, staff_3  Female, staff_9  Female, Staff_4  Female, staff_2 | - *It was already an established project, so it was easy to jump into without having to lead it* - *It’s easier to get some research experience on what the whole process is all about without having those responsibilities of leading a project* - *To be part of something new; we got offered the opportunity to do it; I didn’t know what I was in for but decided to give it a go just as teamwork – part of the team* - *My reason was that I wanted to get involved in research* - *The team had a lot of research opportunities; this was the first one that really extended to allied health to join* - *It was just to dip my toes in the research pool and get an understanding of how it works; but actually, to see what gets done with the information and how it is processed* - *My learning goals were around service evaluation and research planning* - *I wanted to learn skills to transfer across one day doing my own research* - *I wanted to be part of it and I thought it was important to do that as part of a new service* |
|  | Facilitator  ‘Peer Support’ | Female, staff_3  Male, Staff_1  Female, staff_8  Female, staff_5  Female, staff_9  Female, staff_4  Staff, male_1  Female, staff_2 | - *felt supported, I haven’t been given a huge amount of patients to follow up, we haven’t been expected to do as many phone calls as other staff members* - *There is understanding that its hard when everyone’s clinical but I think people in the team understand that its hard to fit everything in (paraphrased)* - *I felt supported by the trauma service but not my department* - *I felt supported, I haven’t been given a huge amount of patients to follow up, we haven’t been expected to do as many phone calls as other staff members* - *There is understanding that its hard when everyones clinical but I think people in the team understand that its hard to fit everything in (paraphrased)* - *I know that my colleagues will often take up my shortcomings shall I say* - *In turn sometimes they know I have dealt with patients that are on the list and they will notify me and Ill call those patients because I often have a relationship with them* - *I didn’t feel like much support was needed* - *But you had a go to person absolutely* - *There was always someone to ask if maybe you needed to escalate a cause for concern* - *There was always someone available if you needed them* - *I used the team for their alternative suggestions to make sure we were doing the right thing for the patient (paraphrased)* - *In those situations where people identified through their interview that they did have issues, staff would come to me with advice around what they should do, how to escalate it* - *These are the types of things where I am asked to provide support for other staff doing phone calls, because they just want to confirm that there is an appropriate referral pathway* - *Having a group that was passionate about the project* - *We got buy in from our allied health team, so that helped facilitate the project* - *Some patients (spinal), I didn’t feel comfortable asking questions, I voiced concerns and there was lots of support* - *If youre not comfortable ringing a person for a particular reason then it was never a pressure to do so* - *If you ever had an issue there was always someone you could talk to* - *You debrief because you know – you knew what the issue was* - *You were never made to feel a fool or that you weren’t pulling you weight* - *I thought it was nice to know that there wasn’t the pressure you had to do; if there wasn’t that grace to be able to bow out and I don’t think I would be interested in continuing* - *If we have any issues we can talk about it within the team* - *If someone is having, or in crisis or needs referral back in we can talk about how we can do that within the team* - *I didn’t feel like I needed any support personally* - *I feel that I was supported because it was a new task, and I was able to ask questions* - *I do feel that I was supported during my role* - *I think we learnt from each other’s experiences in terms of things that happened, it was something that was discussed* - *I feel that we do communicate just generally in terms of what we’ve learnt in sharing our experiences with others* |
| Post | Facilitator  ‘Leadership” | Female, staff_5 | - *QLD health supports us to do the follow up program but without resources* - *We may need to show project outcomes before resources can be provided (by the organisation)* - *Potentially, if we show outputs, particularly linking it to hospital care, we may be able to get resources* - *The department is supportive (paraphrased)* |
|  | Facilitator  ‘Teamwork’ | Female, staff_5  Female, staff_8  Female, staff_5 | - *I think the more engagement of all of us in the clinical roles in this sort of program is advantageous and it builds our team strength* - *I felt like I had to contribute to the team; I felt that I wasn’t contributing enough when other staff were doing the follow up phone calls* - *I didn’t feel peer pressure, no, but I felt like I wasn’t helping enough* - *There have been times when the other team members have done all their calls and they have offered to do my calls which has helped the load, which I think is fine* - *I haven’t had anyone come to me and say im not getting these calls done* - *The (patient) packages are all put together, its very easy for us; we just access them and start making our calls* - *Having a research coordinator that was able to help coordinate the project* - *We’ve got great AO support that helps with the letters* |

**Supplement 5 Table s8 Quotes illustrating themes in relation to process element**

Theme 6 – Emotional Impact

SUSTAINABILITY

| **Timepoint** | **Barrier/Facilitator** | **Participant** | **Quote** |
| --- | --- | --- | --- |
| Pre | Barrier | Male, staff_6  Male, Staff_1  Female, staff_4  Female, staff_3  Female, staff_2  Female, staff_9 | - *Risk to TS staff of mental, emotional stress and frustration if issues are identified and you are unable to cope; of becoming too invested in the process* - *A little apprehensive about some calls, I think it is just you know some of the personality traits or the issues patients may have experienced in the past* - *You’re worried that they will maybe have a negative reaction to you or a memory of you because you’re bringing up an experience for them that wasn’t positive necessarily in their life* - *personal anxiety, and that’s just not even about the phone call specifically, that’s just me in general, I hate having to make calls* - *There were patients who were not doing well, even at 12 months; that’s pretty sad; it certainly pulls on the heart strings* - *Some of the calls are really draining; draining in the way you just get sick of making the calls because its monotonous* |
| Post | Barrier | Female, staff_3  Female, staff_8  Female, staff_9  Female, staff_6 | - *Frustration when the patients are taking a really long time to answer* - *Some phone calls are tedious because people felt they needed to explain every answer* - *(The patient) sounded quite annoyed; that made me nervous and you just want to quickly get it over and done with* - *Sometimes it felt repetitive* - *It’s a bit exhausting and that’s draining* - *Draining in the way you just get sick of making these phone calls – because its monotonous* - *I do sometimes feel frustration at the ones where there is service gaps* - *Sometimes it is a little disheartening* - *You do get a bit frustrated at times doing multiple calls* - *I sometimes feel uncomfortable when I have to do the calls (for patients who are still in hospital)* - *I felt anxious about making the call, I didn’t really know where they were at* - *I felt a bit sick asking some of the questions* |
| Post | Facilitator | Female, staff_3  Female, staff_8  Female, staff_9  Female, staff_6  Male, staff_1 | - *Sometimes if I knew, if I remembered the patient, it could be a positive too – you’d have that opportunity to have a nice conversation with them and see how they are going and maybe they might give you more information than what they previously would have given someone they hadn’t met before* - *It did feel rewarding* - *I felt good that I helped someone … it was a good feeling* - *It was super; loved calling up.. I think it was really nice to get a good news story* - *You get the really, really good calls where you’re like, wow, that’s a really good news story* - *uplifting* |

**Supplement 5 Table s9 Quotes illustrating themes in relation to process element**

Theme 6 – Rewards

SUSTAINABILITY

| **Timepoint** | **Barrier/Facilitator** | **Participant** | **Quote** |
| --- | --- | --- | --- |
| Post | Facilitator | Female, staff_9  Female, staff_4  Male, staff_1 | - *You can tell when the person has been delighted to have a phone call; so that’s a reward in itself* - *Knowing that someone has had that phone call and they have enjoyed that* - *Then you do create a bond with someone, and you feel like you actually have helped and so its those times that you actually think, this is worth it* - *If you think – who else would have followed up on this phone call – this is really important because we are actually making a difference* - *They do say that they appreciate us, our phone calls, that they’ve got someone to talk to* - *It’s good to hear where they got to at 6 and 12 months down the track* - *There was one patient that I worked with quite a bit on the ward, and they had a significant injury; it was just super, loved calling up and hearing that he has returned to full time work* - *It was nice to get a bit of a good news story because we know that the odds were stacked against this person and the behaviours/injuries were really challenging for everyone to navigate* - *It was nice to know that it all turned out* - *Overall, I think I generally enjoy doing the interviews* - *Having a conversation and seeing how people are going is in itself a reward to me* - *I find it uplifting, it’s a strange thing with trauma I didn’t really expect; that people have life changing incidents and they speak quite positively about it – it’s almost spiritual* - *That cathartic changes I’ve seen in some people is nothing short of amazing* |
|  | Positive experience | Staff, male_1  Female, staff_2  Female, staff_3  Female, staff_8  Female, staff_9  Female, staff_5  Female, Staff_4 | - *I’ve done several calls and patient were appreciative of the contact, the follow up and the opportunity to talk* - *I find it a pleasant and uplifting experience usually for my part and I feel that from the patient as well* - *They’re like wow, yeah, somebody is still thinking about me and somebody is still listening to me* - *I find it uplifting, it’s a strange thing with trauma I didn’t really expect; that people have life changing incidents and they speak quite positively about it – it’s almost spiritual* - *That cathartic change I’ve seen in some people is nothing short of amazing* - *Overall, I think I generally enjoy doing the interviews* - *Having a conversation and seeing how people are going is in itself a reward to me* - *The interaction is nice for them, having someone listen to them* - *When I spoke to the patient, they were just so happy to have somebody ring then and ask how they were feeling and just to have that time to actually spend with them just chatting* - *I think that’s a big thing and I’m sure that’s a nursing thing maybe* - *You’re building a relationship with them* - *I felt that was a very positive experience because you had actually – you had made a difference in someone’s’ day* - *The people knew that you were calling which was nice, so they were expecting the phone call* - *The good phone calls, they were happy to talk to you, answered questions nice and succinctly and were happy to give feedback* - *Even if they had some negative feedback, it was really nice to feel that there was an opportunity for people to do that* - *Sometimes if I knew, if I remembered the patient, it could be a positive too – you’d have that opportunity to have a nice conversation with them and see how they are going and maybe they might give you more information than what they previously would have given someone they hadn’t met before* - *Positively I think they were the calls were people where expecting your calls and they were just happy to hear from you and had the time straight away and didn’t sound annoyed that you were calling at that particular time* - *They just understood that there were just some questions to answer and they answered succinctly and gave, even if it was some negative feedback, they gave useful feedback* - *In one call the patient sounded quite annoyed that id called at that time and just wanted to get it over and done with, but after talking and whether it was just that then she had an opportunity, so it broke down the walls a little bit, her being able to talk about what the struggles were* - *I think it was nice that the reactions of patients, that they weren’t forgotten, that they could communicate if there was a problem* - *Knowing that someone has had that phone call and they have enjoyed that* - *You can tell when the person has been delighted to have a phone call; so that’s a reward in itself* - *I enjoyed them, I actually did* - *It was nice when you recognised the patients name and you could relate to them, as I remember you coming in* - *So yeah performing the telephone calls did give you some reward* - *Overall I’ve had a great experience* - *It made you feel like a better nurse whenever you were that person who helped care for that patient and it did make them feel like they weren’t forgotten* - *Just trying to help a patient was something that I was happy to do* - *Improving someone’s day, someone’s life, helping them feel happier rather than feel sad* - *Then you do create a bond with someone and you feel like you actually have helped and so its those times that you actually think, this is worth it* - *Just to hear patients being appreciative – it was a good day* - *They do say that they appreciate us, our phone calls, that they have got someone to talk to* - *I was tasked with a calling a patient with a SCI, I wasn’t looking forward to it, in the end I quite enjoyed – because pf the patient’s progression – it left a positive spin on the process of doing follow up* - *Its really good to hear where they got to 6 and 12 months down the track* - *There was client that had a significant injury – it was super, rewarding; loved calling up and hearing that they have returned to full time work* - *It was really nice to get a good news story* |
|  | motivation | Female, staff_3  Female, staff_8  Female, staff_9  Female, Staff_4 | - *I thought it would be interesting to hear from patients what’s life is like after they leave hospital* - *Is there anything that we could be doing better while the patients is an inpatient* - *Are there any themes that even I specifically as a physio might be able to think more about when the patients an in-patient* - *Indirect feedback about how physios and allied health in general might manage patients on the ward and what we might be missing, and that’s an opportunity to improve on our practice* - *Your personal motivation is being able to help patients, you get a lot back from doing that* - *I felt more motivated to do things in a two-hour slot than I did to do it over an 8 hour day* - *Some feedback is that patients actually like the call, they found it more personable* - *They do say that they appreciate us, our phone calls, that they’ve got someone to talk to* - *The support (from the team) was a motivator* - *Are there things that I could have facilitated earlier in order to get them back to that* |
|  | Positive Emotions | Female, staff_3  Female, staff_9  Female, staff_8  Female, staff_2 | - *The person on the phone influences your perception of the call* - *I find now having more experience, when someone is getting cranky, I don’t take it to heart like I used to* - *There was a patient who wasn’t happy with the overall service; I didn’t take it personally, its his journey, its his experience; I didn’t come away feeling deflated; I was okay* - *I guess you could say there was a positive or a sad and a happy feeling, depending on where the person is in their timeline* |
